# Supplementary material
Source: PubMed Central journal article supplement (PMC8883439)

# Supplemental Figure S1

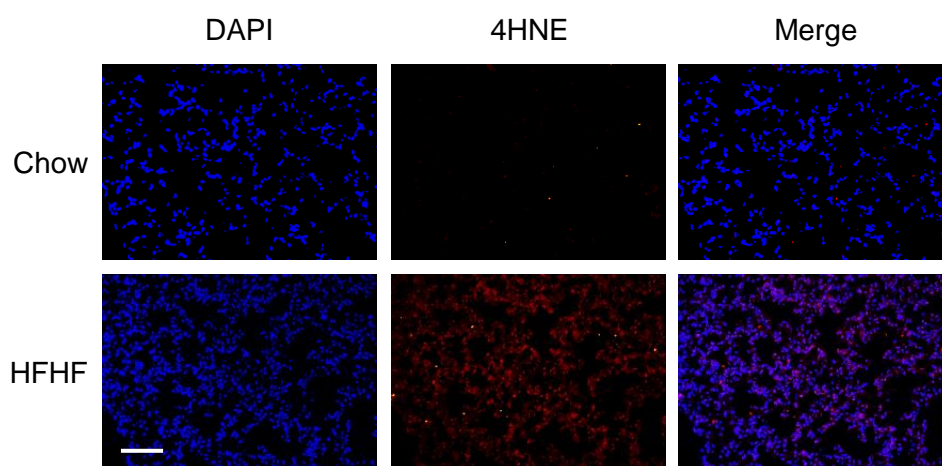

Supplement: mmc1.pdf [file mmc1.pdf]

# Supplemental Figure S2

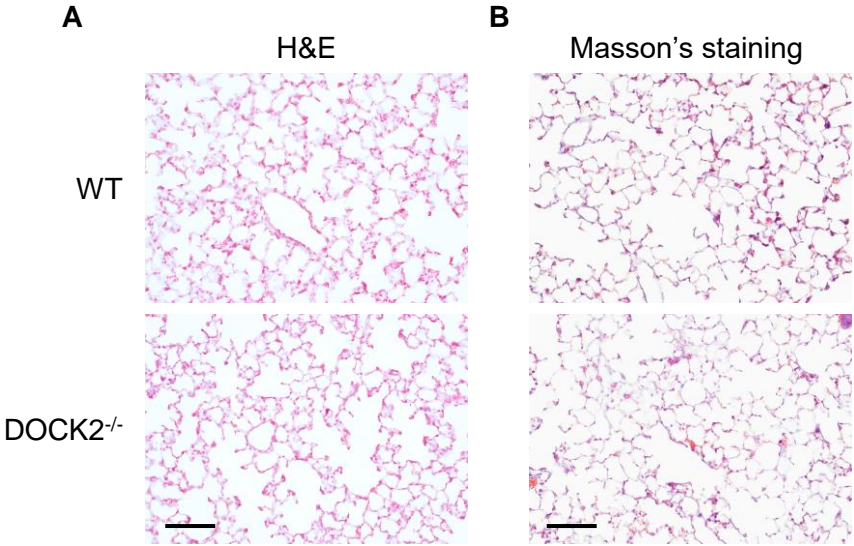

Supplement: mmc2.pdf [file mmc2.pdf]

# Supplemental Figure S3

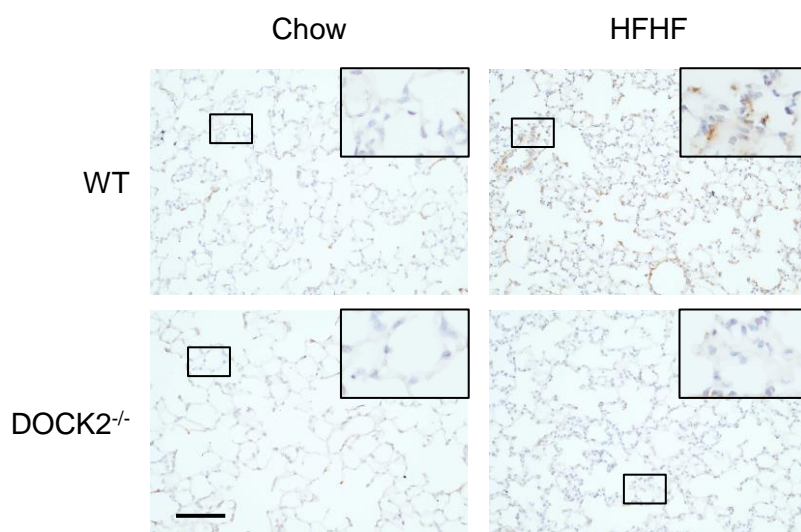

Supplement: mmc3.pdf [file mmc3.pdf]

# Supplemental Figure S4

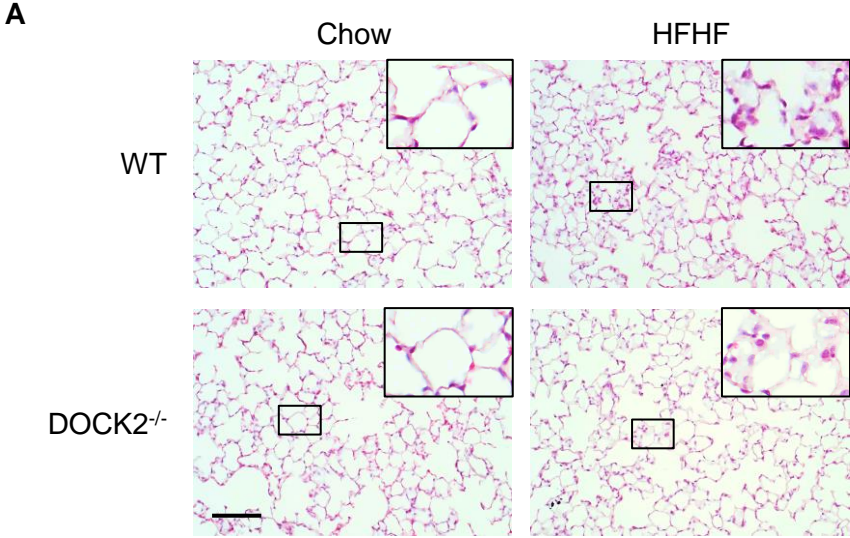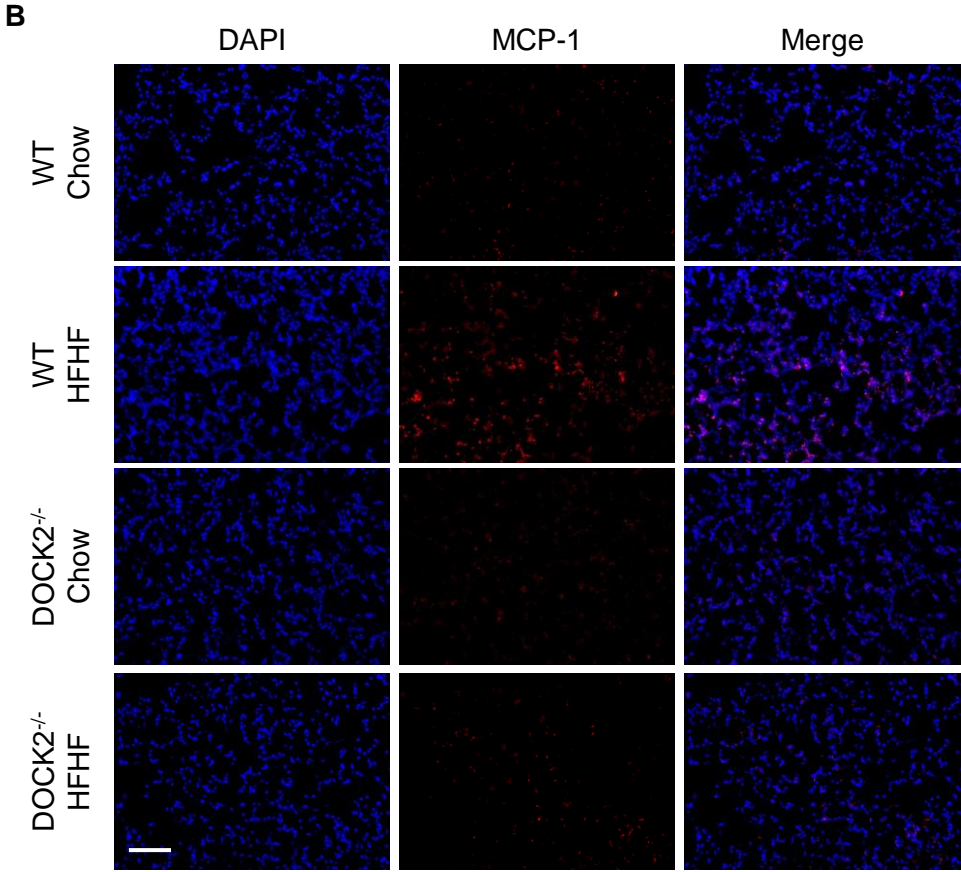

Supplement: mmc4.pdf [file mmc4.pdf]

# Supplemental Figure S5

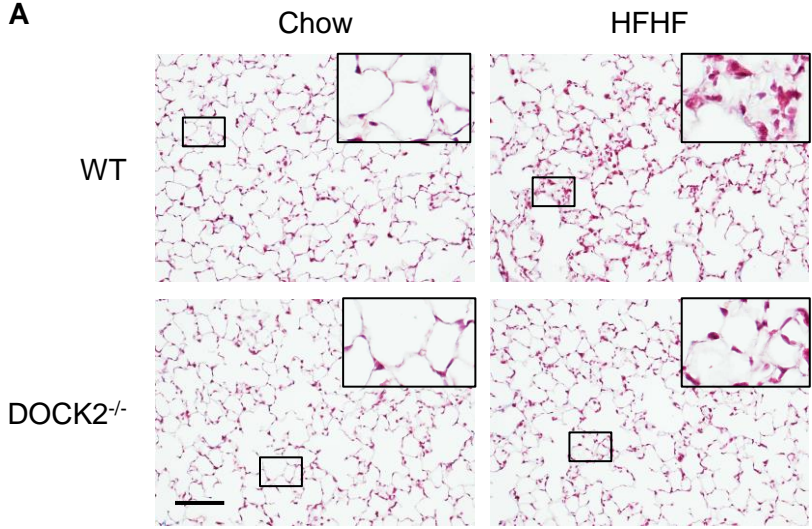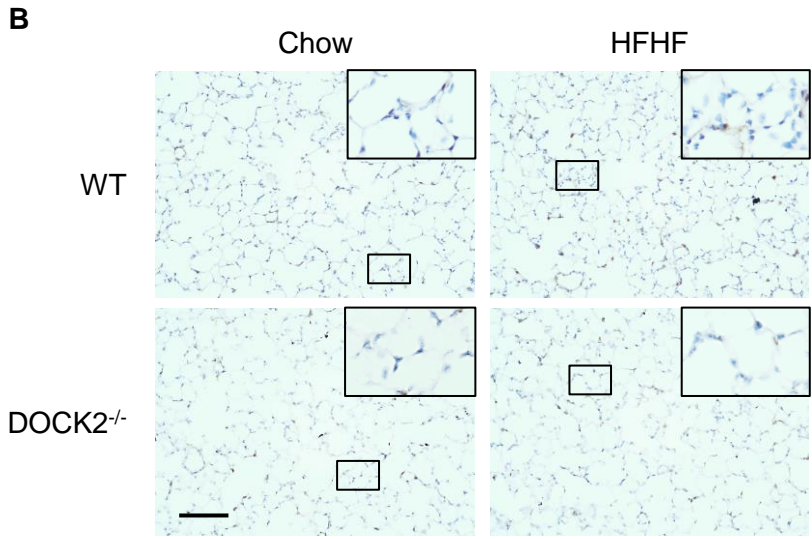

Supplement: mmc5.pdf [file mmc5.pdf]

# Supplemental Figure S6

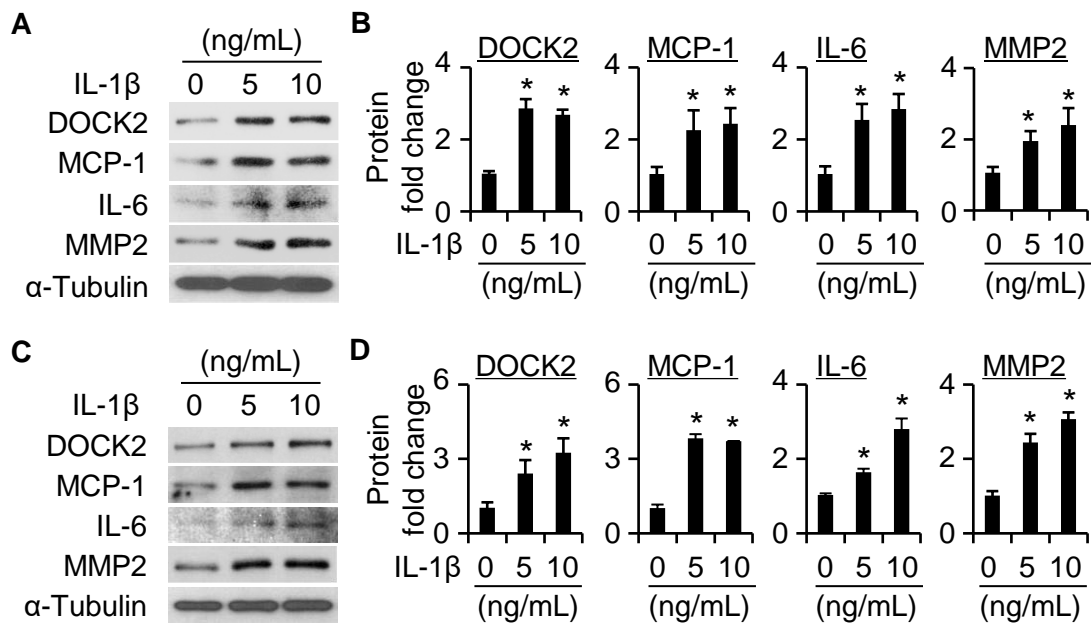

Supplement: mmc6.pdf [file mmc6.pdf]

# Supplemental Figure S7

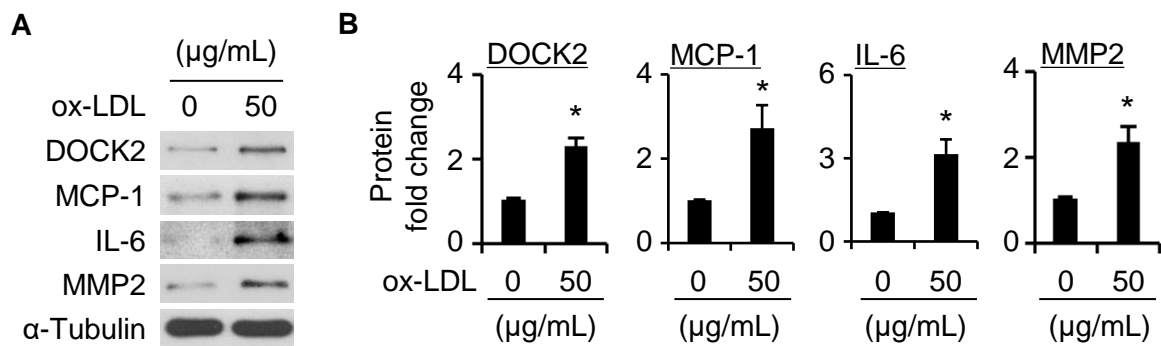

Supplement: mmc7.pdf [file mmc7.pdf]

# Supplemental Figure S8

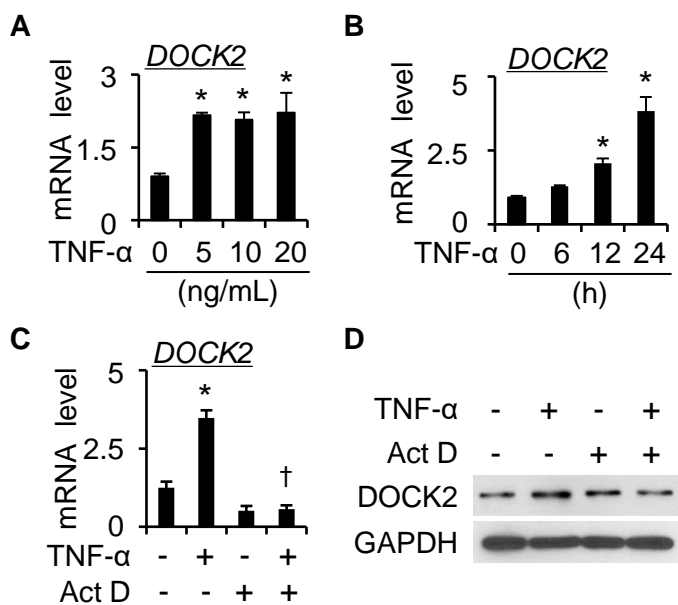

Supplement: mmc8.pdf [file mmc8.pdf]
